# Supplementary material for: Dynamics of a host–parasitoid interaction clarified by modelling and DNA sequencing
Source: PubMed Central journal article supplement — Ecol Lett. 2020 Mar 23;23(5):851–9. doi: 10.1111/ele.13486 (PMC7187309; doi:10.1111/ele.13486), 2020-03-23

Host,  $a = 0.0005$ 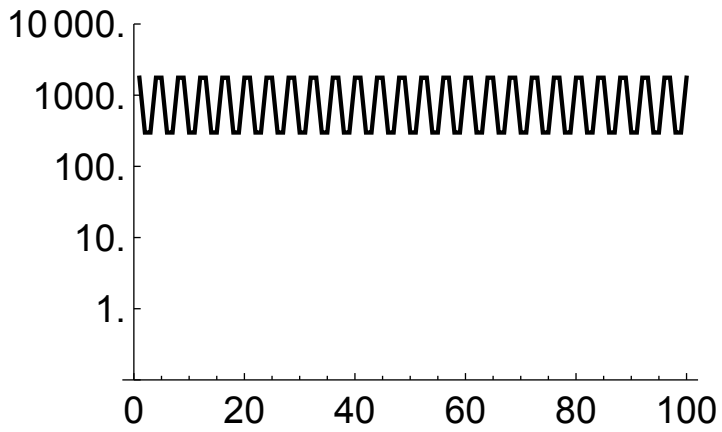Parasitoid,  $a = 0.0005$ 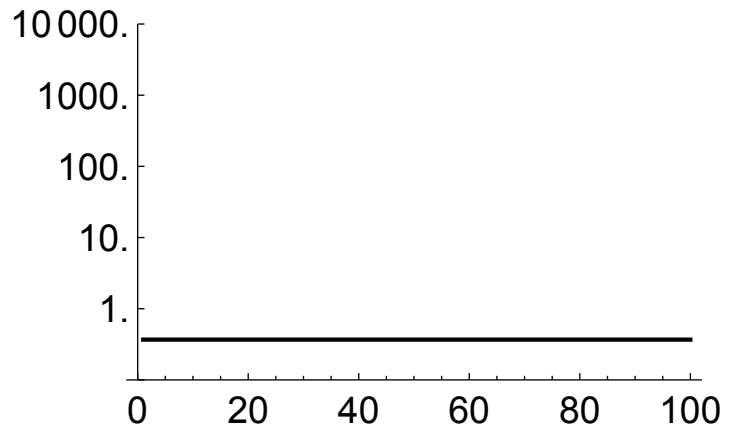Host,  $a = 0.002$ 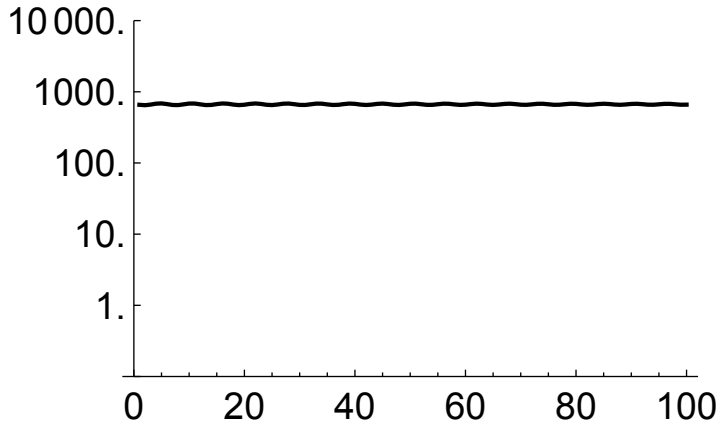Parasitoid,  $a = 0.002$ 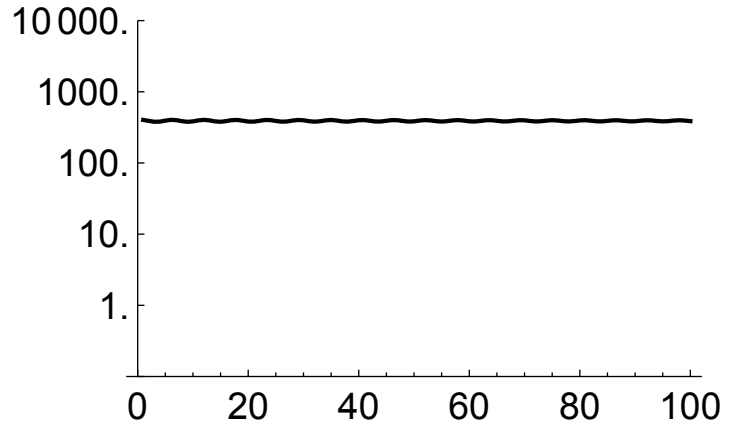Host,  $a = 0.005$ 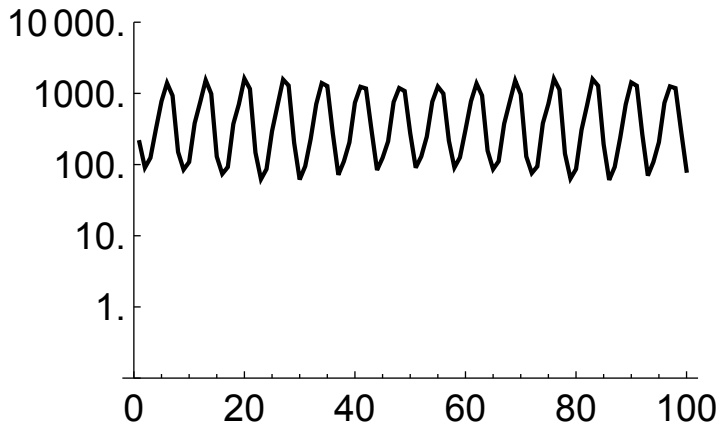Parasitoid,  $a = 0.005$ 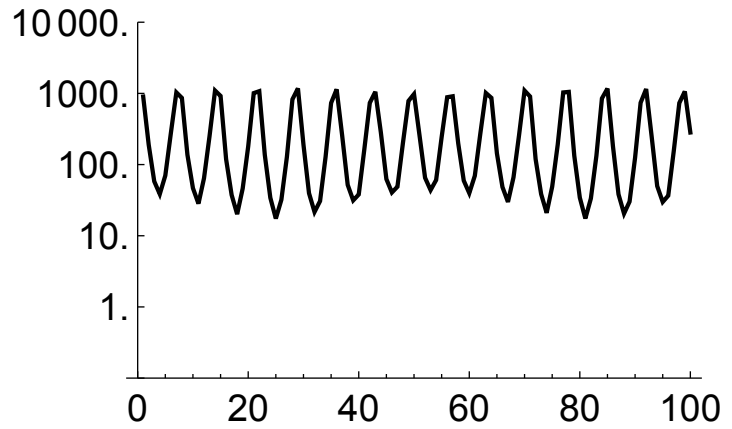Host,  $a = 0.05$ 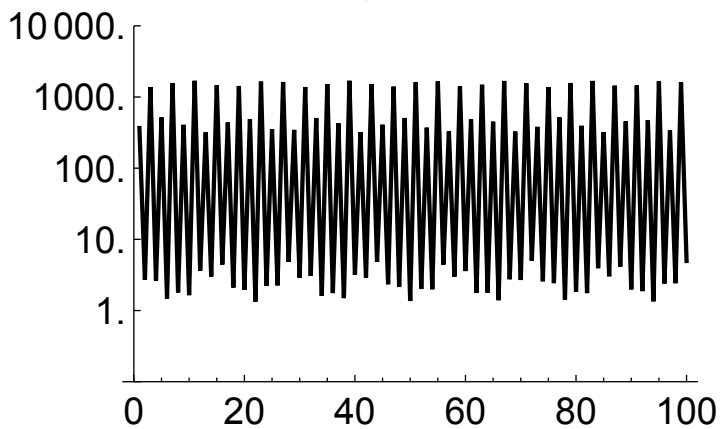Parasitoid,  $a = 0.05$ 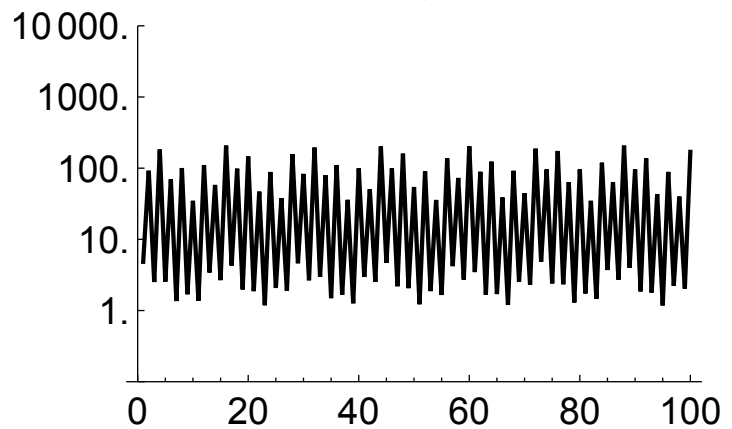Host,  $a = 0.12$ 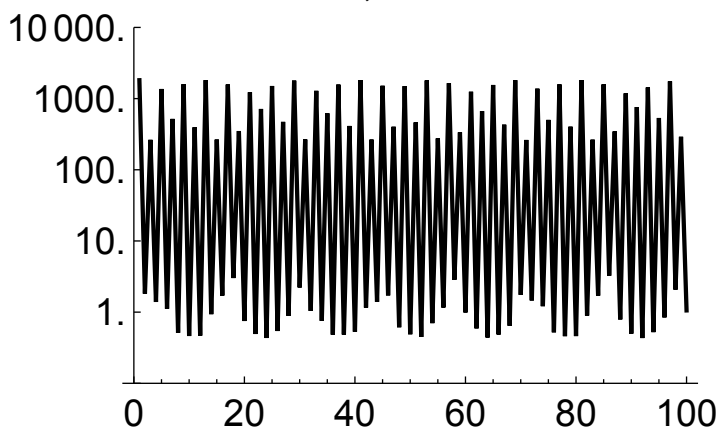Parasitoid,  $a = 0.12$ 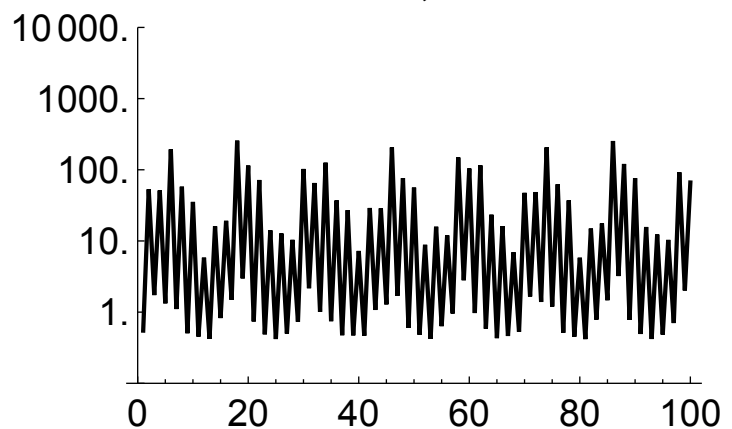Host,  $a = 100$ 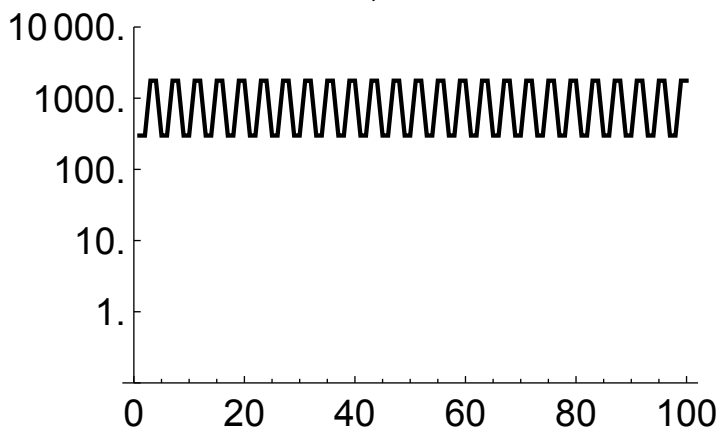Parasitoid,  $a = 100$ 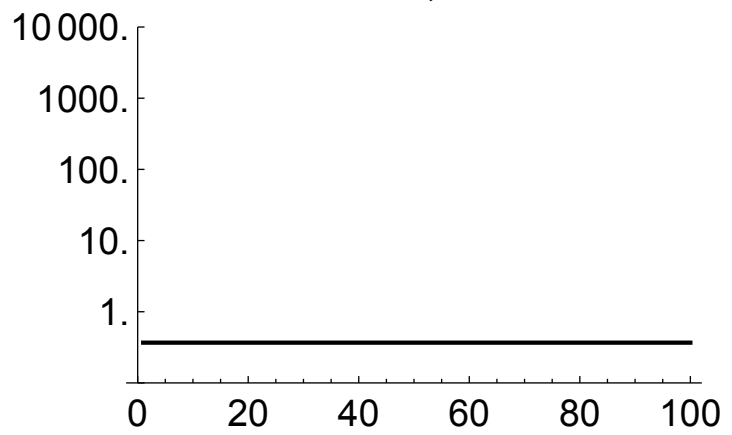

Supplement: ELE-23-851-s003.pdf [file ELE-23-851-s003.pdf]
