# Supplementary material for: Dynamics of a host–parasitoid interaction clarified by modelling and DNA sequencing
Source: PubMed Central journal article supplement — Ecol Lett. 2020 Mar 23;23(5):851–9. doi: 10.1111/ele.13486 (PMC7187309; doi:10.1111/ele.13486), 2020-03-23
Supplement: ELE-23-851-s004.pdf [file ELE-23-851-s004.pdf]

| Species                  | 1978     | 1979       | 1980      | 1981        | 1982      | 1983       | 1984      | 1985        | 1986     | 1987       | 1988     | 1989      | 1990     | 1991       | 1992      | 1993       | 1994      | 1995       | 1996      | 1997        | 1998     | 1999        | 2000     | 2001       | 2002     | 2003      | 2004     | 2005       | 2006     | 2007       | 2008      | 2009        | 2010     | 2011        | 2012      | Total        |
|--------------------------|----------|------------|-----------|-------------|-----------|------------|-----------|-------------|----------|------------|----------|-----------|----------|------------|-----------|------------|-----------|------------|-----------|-------------|----------|-------------|----------|------------|----------|-----------|----------|------------|----------|------------|-----------|-------------|----------|-------------|-----------|--------------|
| <i>Xestia alpicola</i>   | 0        | 44         | 5         | 618         | 19        | 193        | 3         | 671         | 0        | 156        | 1        | 4         | 1        | 58         | 2         | 106        | 2         | 230        | 2         | 438         | 5        | 767         | 3        | 63         | 1        | 14        | 2        | 57         | 0        | 381        | 11        | 401         | 1        | 333         | 8         | 4600         |
| <i>Xestia borealis</i>   | 0        | 0          | 0         | 0           | 0         | 0          | 0         | 1           | 0        | 0          | 0        | 0         | 0        | 0          | 0         | 0          | 0         | 0          | 1         | 0           | 0        | 0           | 0        | 0          | 0        | 0         | 0        | 0          | 1        | 0          | 1         | 0           | 0        | 0           | 4         |              |
| <i>Xestia gelida</i>     | 0        | 0          | 0         | 2           | 0         | 2          | 0         | 5           | 0        | 3          | 0        | 1         | 0        | 3          | 0         | 4          | 0         | 1          | 0         | 1           | 0        | 6           | 0        | 0          | 0        | 0         | 2        | 0          | 2        | 3          | 2         | 1           | 0        | 1           | 0         | 36           |
| <i>Xestia laetabilis</i> | 0        | 37         | 0         | 59          | 0         | 22         | 0         | 77          | 0        | 17         | 0        | 6         | 0        | 14         | 0         | 46         | 0         | 26         | 0         | 59          | 0        | 78          | 0        | 6          | 0        | 16        | 0        | 30         | 0        | 28         | 40        | 27          | 0        | 27          | 0         | 588          |
| <i>Xestia rhoetica</i>   | 1        | 2          | 0         | 13          | 0         | 9          | 0         | 31          | 0        | 20         | 0        | 1         | 0        | 4          | 0         | 4          | 0         | 7          | 0         | 28          | 1        | 53          | 0        | 20         | 0        | 1         | 1        | 2          | 0        | 3          | 6         | 20          | 1        | 32          | 4         | 264          |
| <i>Xestia sincera</i>    | 0        | 0          | 0         | 1           | 0         | 1          | 0         | 8           | 0        | 0          | 0        | 0         | 0        | 0          | 0         | 0          | 0         | 0          | 0         | 0           | 0        | 0           | 0        | 0          | 0        | 0         | 0        | 0          | 0        | 0          | 0         | 0           | 0        | 0           | 0         | 10           |
| <i>Xestia speciosa</i>   | 0        | 2          | 1         | 12          | 0         | 13         | 0         | 40          | 0        | 21         | 0        | 0         | 0        | 3          | 0         | 5          | 0         | 10         | 0         | 34          | 0        | 96          | 0        | 37         | 0        | 4         | 0        | 36         | 0        | 93         | 1         | 135         | 241      | 0           | 784       |              |
| <i>Xestia tecta</i>      | 3        | 103        | 8         | 1007        | 11        | 681        | 18        | 919         | 6        | 360        | 0        | 8         | 6        | 108        | 8         | 265        | 51        | 550        | 50        | 625         | 1        | 769         | 1        | 180        | 0        | 57        | 0        | 94         | 0        | 324        | 3         | 2748        | 5        | 412         | 15        | 9396         |
| <b>Total</b>             | <b>4</b> | <b>188</b> | <b>14</b> | <b>1712</b> | <b>30</b> | <b>921</b> | <b>21</b> | <b>1752</b> | <b>6</b> | <b>577</b> | <b>1</b> | <b>20</b> | <b>7</b> | <b>190</b> | <b>10</b> | <b>430</b> | <b>53</b> | <b>824</b> | <b>52</b> | <b>1186</b> | <b>7</b> | <b>1769</b> | <b>4</b> | <b>306</b> | <b>1</b> | <b>92</b> | <b>3</b> | <b>221</b> | <b>0</b> | <b>833</b> | <b>21</b> | <b>3347</b> | <b>7</b> | <b>1046</b> | <b>27</b> | <b>15682</b> |
