# Supplementary figures and images for: Dynamics of a host–parasitoid interaction clarified by modelling and DNA sequencing
Source: PubMed Central journal article supplement — Ecol Lett. 2020 Mar 23;23(5):851–9. doi: 10.1111/ele.13486 (PMC7187309; doi:10.1111/ele.13486), 2020-03-23

**A**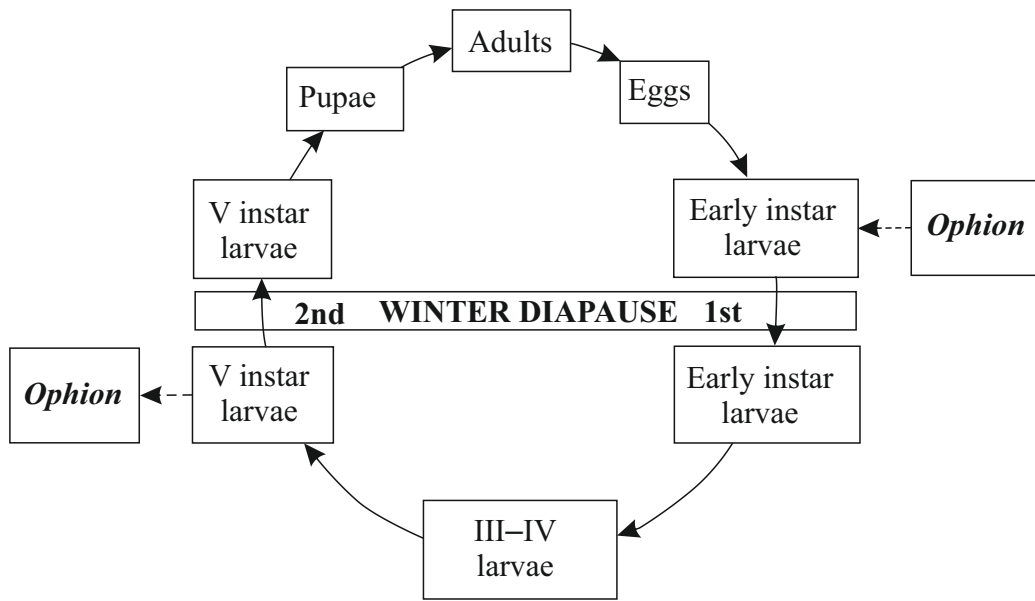**B**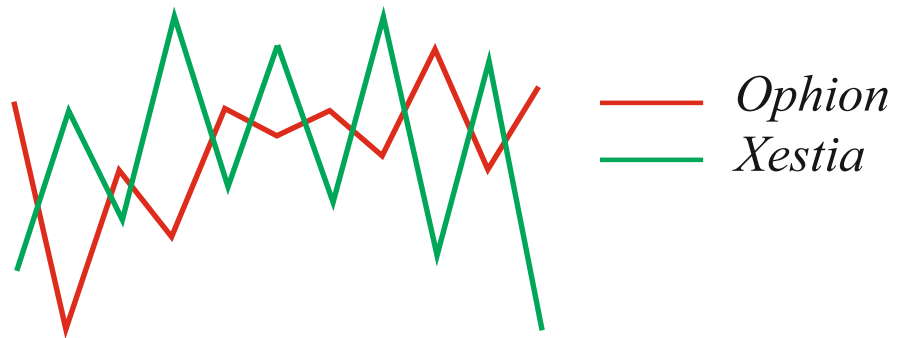**C**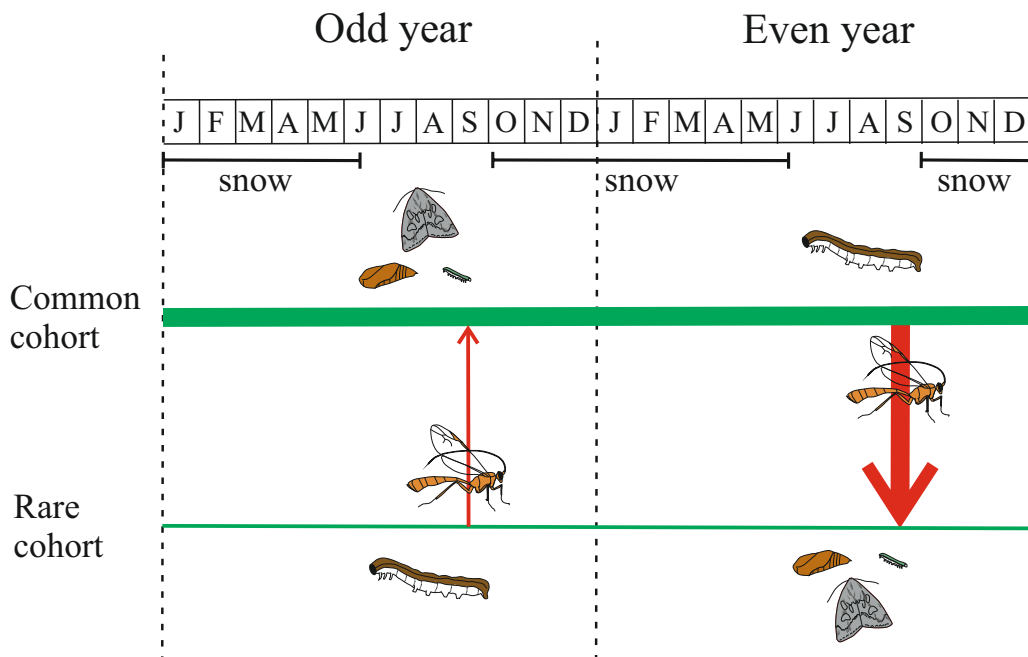

Supplement: ELE-23-851-s001.pdf [file ELE-23-851-s001.pdf]
